# Supplementary material
Source: publisher figshare collection journal article supplement (https://acs.figshare.com/ndownloader/files/22178460)

**Synthesis, Structure and Reactivity of Alkyl Zinc Complexes Stabilized with 1,1,3,3-Tetramethylguanidine**

Scott D. Bunge,\* Jacob M. Lance and Jeffrey A. Bertke

*Department of Chemistry, Kent State University, Kent OH, 44242-0001*

*\* Author to whom correspondence should be sent. Fax: (330) 672-3816; Tel: (330) 672-9445; E-mail: sbunge@kent.edu*

Supporting Information

**Figure S1.** Thermal ellipsoid plot of **5**. Ellipsoids are drawn at the 30 % level. H atoms have been omitted for clarity.

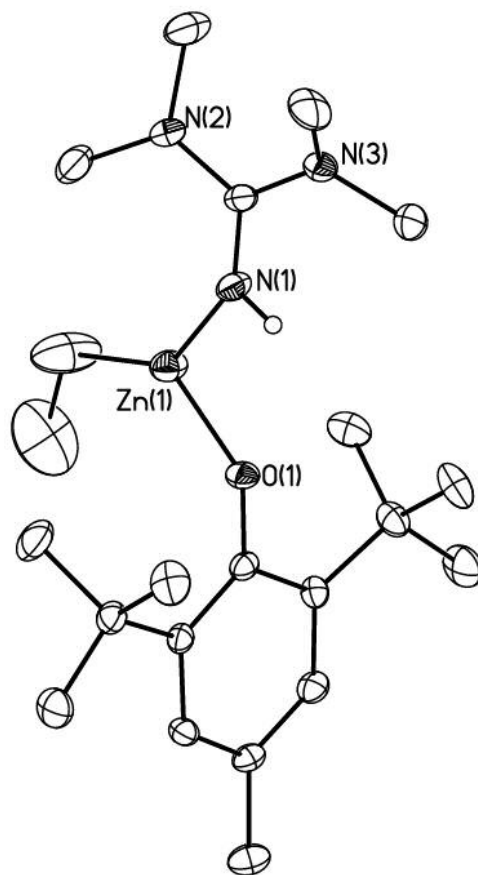

**Figure S2.** Thermal ellipsoid plot of **9**. Ellipsoids are drawn at the 30 % level. H atoms have been omitted for clarity.

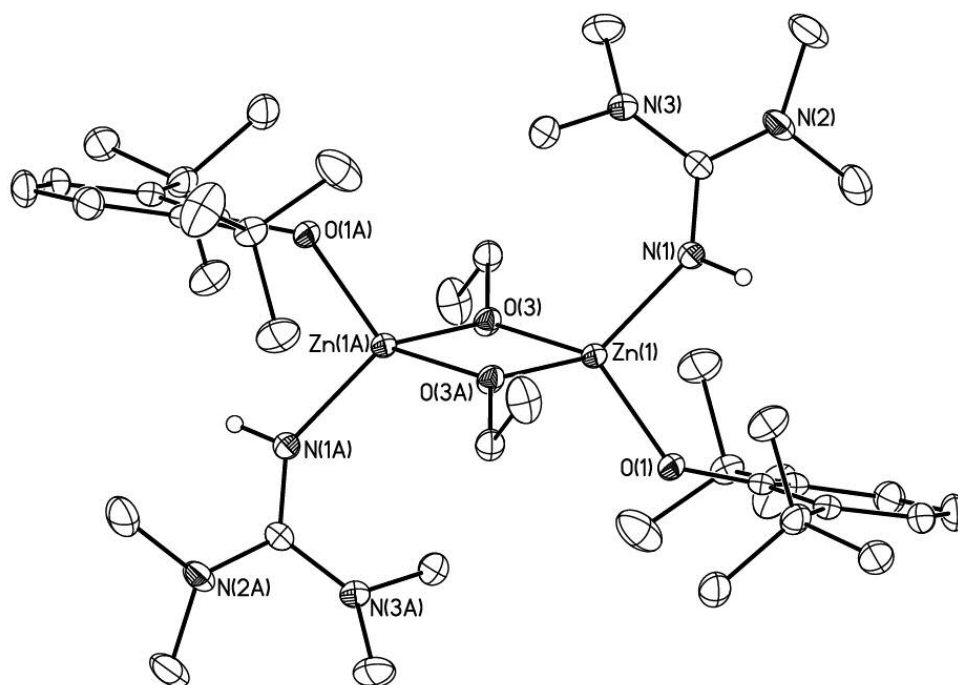

**Figure S3.** MALDI-TOF mass spectra (0 to 10000 m/z). Samples were dissolved in THF; 2,5-dihydroxybenzoic acid (DHBA) was used as the matrix material.

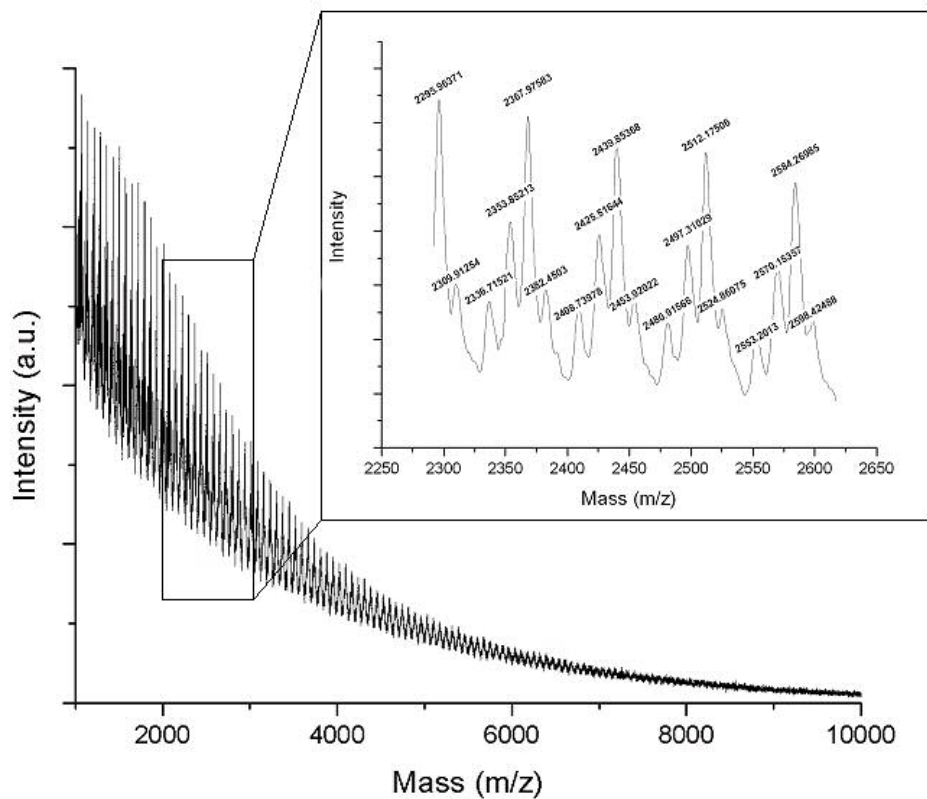

Supplement: Supplementary file 1 [file 22178460]
